# Supplementary material for: Dry Dosage Forms of Add-Value Bioactive Phenolic Compounds by Supercritical CO2-Assisted Spray-Drying
Source: MDPI journal article supplement (doi:10.3390/molecules27062001), 2022-03-20
Supplement: s1 [file s1]

## Supplementary material

**Table S1**–Constant SASD parameters.

| F <sub>CO2</sub> | F <sub>Feed</sub> | T <sub>in</sub> | T <sub>SM</sub> | T <sub>hCO2</sub> | T <sub>cCO2</sub> | P <sub>SM</sub> | d <sub>nozzle</sub> |
|------------------|-------------------|-----------------|-----------------|-------------------|-------------------|-----------------|---------------------|
| (mL/min)         | (mL/min)          | (°C)            | (°C)            | (°C)              | (°C)              | (MPa)           | (μm)                |
| 25               | 3.5               | 100             | 80              | 80                | –20               | 10              | 150                 |

F<sub>CO2</sub>: CO<sub>2</sub> flow rate; F<sub>Feed</sub>: liquid feed solution flow rate; T<sub>in</sub>: inlet drying gas temperature; T<sub>SM</sub>: saturation temperature; T<sub>hCO2</sub>: CO<sub>2</sub> oil bath temperature; T<sub>cCO2</sub>: CO<sub>2</sub> cooling bath temperature; P<sub>sat</sub>: saturation pressure

**Table S2**–Process yield and physicochemical characteristics of the SASD HPC powders

| HPC<br>(%w/v) | Yield, η<br>(%) | D <sub>v,50</sub><br>(μm) | span | Moisture<br>Content<br>(%H <sub>2</sub> O/g <sub>powder</sub> ) | a <sub>BET</sub><br>(m <sup>2</sup> /g) | SEM (shape/<br>surface) | XRPD<br>(solid-<br>state) |
|---------------|-----------------|---------------------------|------|-----------------------------------------------------------------|-----------------------------------------|-------------------------|---------------------------|
| 2.5           | 34              | 20.24                     | 1.39 | n.a.*                                                           | 1.95                                    | n.a.                    | Amorphous                 |
| 5.0           | 66              | 19.95                     | 1.44 | 4.3 ± 0.6                                                       | 2.62                                    | n.a.                    | Amorphous                 |
| 7.5           | 49              | 18.26                     | 1.52 | 4.6 ± 0.4                                                       | 2.08                                    | Irregular/<br>smooth    | Amorphous                 |
| Raw           | n.a.            | n.a.                      | n.a. | 2.5 ± 0.4                                                       | 0.80                                    | n.a.                    | Amorphous                 |

\* Test not performed due to the insufficient powder amount required for the characterization; n.a. = not available.

**Table S3**–Parameter level values used in 3<sup>2</sup> full factorial design.

|        |                 | Level of factors used in the formulation |     |     |
|--------|-----------------|------------------------------------------|-----|-----|
| Factor |                 | –1                                       | 0   | +1  |
| A      | C_solids (%w/v) | 2.5                                      | 5.0 | 7.5 |
| B      | Ethanol (%v/v)  | 20                                       | 45  | 70  |

C\_solids: solid contents

Levels: low (–1), medium (0) and high (+1).

**Table S4**–Standard experiment order matrix.

| Exp. No. | A  | B  |
|----------|----|----|
| 1        | –1 | –1 |
| 2        | –1 | 0  |
| 3        | –1 | +1 |
| 4        | 0  | –1 |
| 5        | 0  | 0  |
| 6        | 0  | +1 |
| 7        | +1 | –1 |
| 8        | +1 | 0  |
| 9        | +1 | +1 |

**Table S5**–DPPH radical scavenging (%) of RSV tests.

| C <sub>RSV</sub> (μM) | raw RSV      | RSV / 5.0 /<br>45 | RSV / 7.5 /<br>20 | RSV / 7.5 /<br>70 |
|-----------------------|--------------|-------------------|-------------------|-------------------|
| 100                   | 10.75 ± 0.08 | 7.30 ± 0.32       | 11.54 ± 0.34      | 9.79 ± 0.31       |
| 400                   | 28.40 ± 0.75 | 15.22 ± 0.75      | 19.32 ± 1.33      | 22.33 ± 0.57      |
| 800                   | 43.01 ± 0.73 | 24.54 ± 0.67      | 33.60 ± 3.36      | 34.90 ± 0.34      |
| 1200                  | 48.57 ± 5.63 | 38.63 ± 4.29      | 48.27 ± 0.33      | 43.86 ± 0.28      |
| 1500                  | 53.75 ± 5.74 | 37.25 ± 7.21      | 52.26 ± 1.01      | 47.60 ± 0.35      |
| 1800                  | 66.22 ± 2.50 | 46.87 ± 0.46      | 55.45 ± 0.70      | 43.49 ± 2.81      |
| 2100                  | 62.24 ± 1.32 | 49.64 ± 0.63      | 58.09 ± 0.50      | 49.92 ± 0.74      |

**Table S6**–DPPH radical scavenging (%) of GA tests.

| $C_{\text{RSV}} (\mu\text{M})$ | raw GA           | GA / 5.0 / 45     | GA / 7.5 / 20    | GA / 7.5 / 70    |
|--------------------------------|------------------|-------------------|------------------|------------------|
| 50                             | $11.31 \pm 7.18$ | $8.47 \pm 1.54$   | $15.18 \pm 1.13$ | $9.48 \pm 4.58$  |
| 120                            | $31.50 \pm 1.04$ | $24.44 \pm 7.98$  | $41.67 \pm 2.72$ | $43.72 \pm 1.83$ |
| 190                            | $60.67 \pm 1.15$ | $49.96 \pm 8.20$  | $75.95 \pm 3.64$ | $76.82 \pm 4.25$ |
| 260                            | $79.00 \pm 5.48$ | $59.51 \pm 13.75$ | $82.97 \pm 2.42$ | $82.92 \pm 1.25$ |
| 330                            | $88.54 \pm 0.15$ | $59.69 \pm 14.34$ | $85.46 \pm 0.16$ | $81.12 \pm 3.55$ |
| 400                            | $89.17 \pm 0.46$ | $61.58 \pm 10.72$ | $75.47 \pm 1.18$ | $83.86 \pm 0.52$ |
| 470                            | $90.00 \pm 0.12$ | $80.53 \pm 3.46$  | $76.10 \pm 1.01$ | $84.79 \pm 1.25$ |

**Table S7**–Input and released amount of RSV and GA from the *in vitro* release tests.

| Sample         | $C_{\text{input}} (\mu\text{g/mL})$ | $\mu\text{g phenolic input/}$<br>100mg DPF | $C_{\text{máx}}$<br>( $\mu\text{g/mL}$ ) | $\mu\text{g phenolic rel.}/$<br>100mg DPF | %released      |
|----------------|-------------------------------------|--------------------------------------------|------------------------------------------|-------------------------------------------|----------------|
| Raw RSV        | $40.9 \pm 0.2$                      | –                                          | $1.4 \pm 0.4$                            | –                                         | $3 \pm 1$      |
| DPF RSV/5.0/45 | $40.714 \pm 0.008$                  | 1017                                       | $8 \pm 1$                                | $201 \pm 32$                              | $20 \pm 3$     |
| Raw GA         | $41.7 \pm 0.7$                      | –                                          | $37 \pm 2$                               | –                                         | $92 \pm 3$     |
| DPF GA/5.0/45  | $40.354 \pm 0.006$                  | 877                                        | $37.2 \pm 0.2$                           | $818 \pm 6$                               | $93.4 \pm 0.8$ |

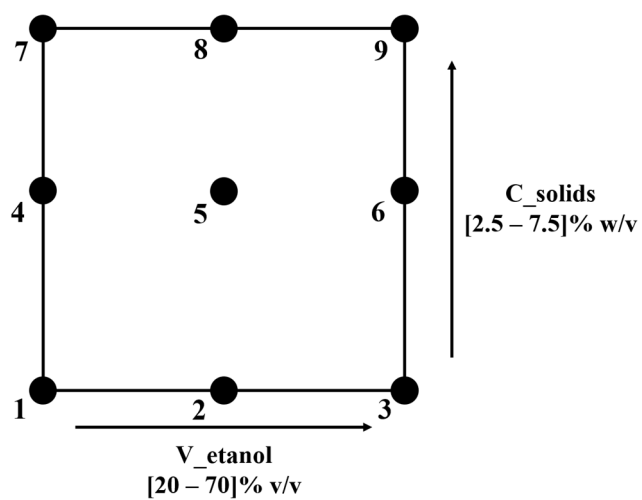

**Figure S1**–Schematic representation of the  $3^2$  full factorial DoE.

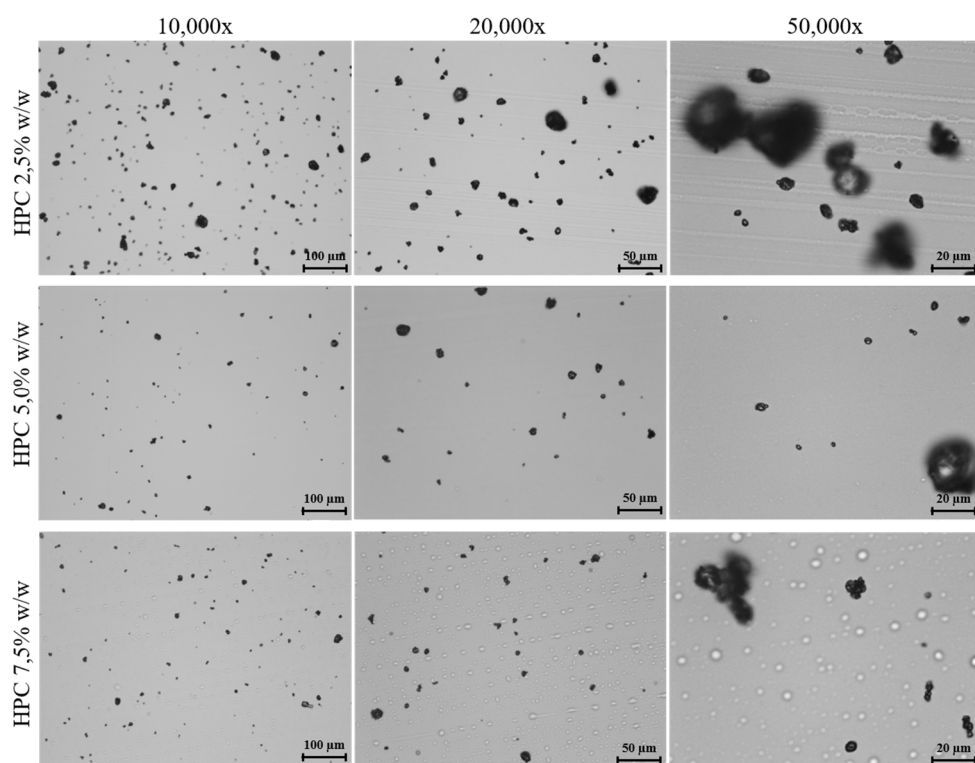

**Figure S2**–Morphology G3 images of the DPFs microparticles with 2.5, 5.0 and 7.5 %w/v of HPC at different image magnifications: 10,000×, 20,000× and 50,000×.

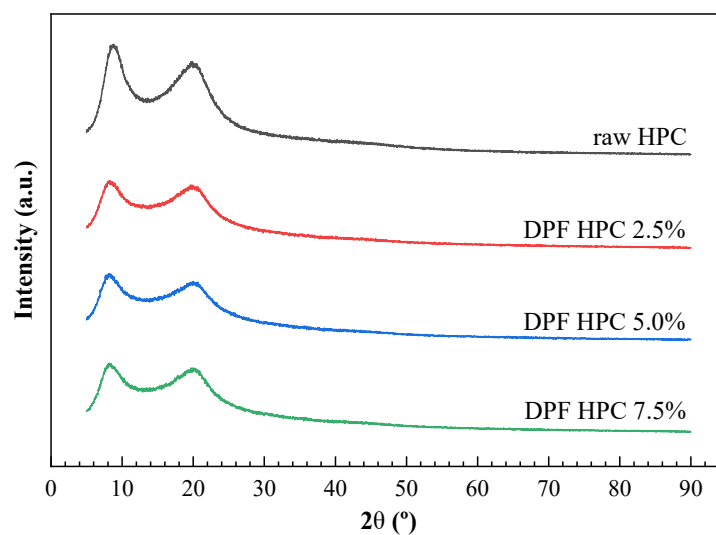

**Figure S3**—XRPD diffraction spectra of raw HPC powder and DPFs with 2.5, 5.0 and 7.5 %w/v HPC.

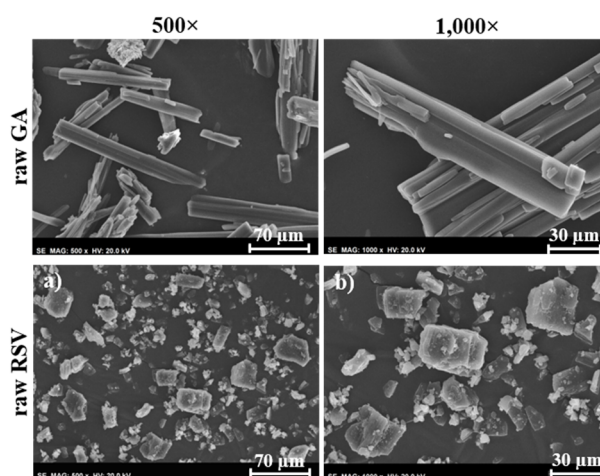

**Figure S4**—SEM images of raw GA and raw RSV at 500 $\times$  and 1,000 $\times$  magnifications.

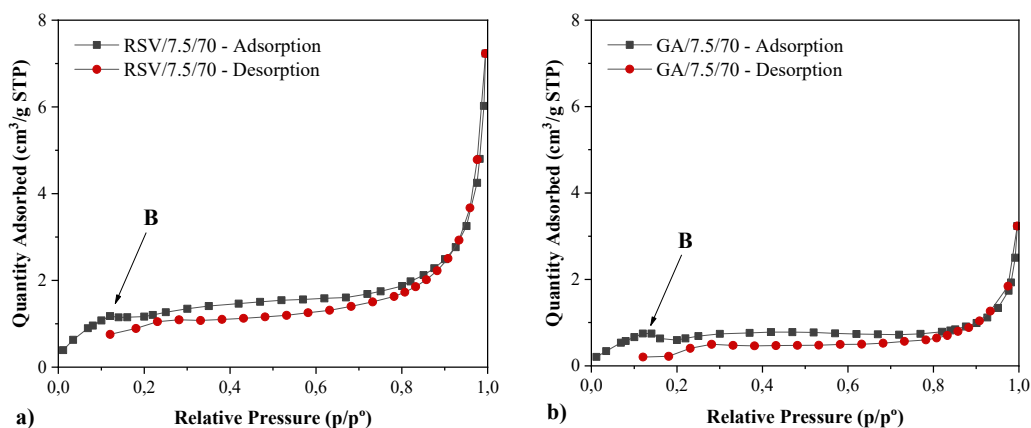

**Figure S5**–Isotherm plots for a) HPC/RSV and b) HPC/GA microparticles obtained by SASD.

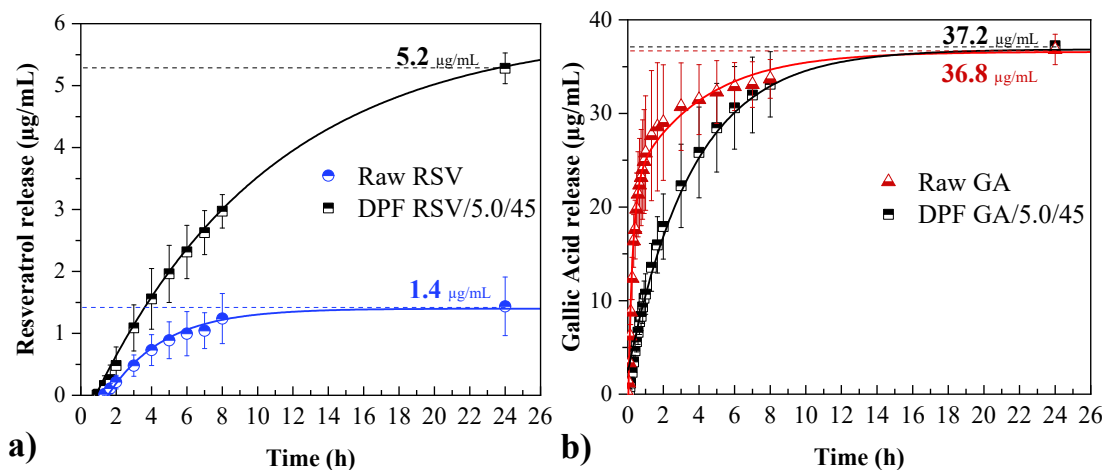

**Figure S6**–In vitro phenolic release profiles in pH 5.5 PBS at 32 °C for 24 hours from a) raw RSV and DPF RSV/5.0/45 samples and b) raw GA and DPF GA/5.0/45 samples, expressed in µg of phenolic per mL of solution.
